# Supplementary material for: A fluorescent aptasensor based on single oligonucleotide-mediated isothermal quadratic amplification and graphene oxide fluorescence quenching for ultrasensitive protein detection
Source: Royal Society of Chemistry journal article supplement (doi:10.1039/c8an01032c), 2018-01-01
Supplement: c8an01032c1.pdf [file c8an01032c1.pdf]

**Fluorescence aptasensor based on single oligonucleotide-mediated isothermal quadratic amplification and graphene oxide fluorescence quenching for ultrasensitive protein detection**

Jiayao Xu,<sup>a</sup> Ming Shi,<sup>a,b</sup> Huakui Huang,<sup>a</sup> Kun Hu,<sup>\*a</sup> Wenting Chen,<sup>a</sup> Yong Huang<sup>\*a</sup> and Shulin Zhao<sup>a</sup>

<sup>a</sup> State Key Laboratory for Chemistry and Molecular Engineering of Medicinal Resources, College of Chemistry and Pharmacy, Guangxi Normal University, Yucai Road 15, Guilin, 541004, P. R. China.

<sup>b</sup> Department of Chemistry and Pharmacy, Guilin Normal College, Guilin, 541001, PR China.

Table S1 Comparison of analytical methods capable of sensing CEA

| Methods                                                        | Detection limit | References |
|----------------------------------------------------------------|-----------------|------------|
| Electrochemical aptasensor                                     | 1.5 pg/mL       | 1          |
| Fluorescence and chemiluminescence aptasensor imaging          | 60 and 48 pg/mL | 2          |
| Fluorescent resonance energy transfer aptasensor               | 100 pg/mL       | 3          |
| Fluorescence aptasensor Exonuclease III–assisted               | 1.2 pg/mL       | 4          |
| Carbon dots-aptasensor                                         | 300 pg/mL       | 5          |
| Fluorescent aptasensor based on GO and quadratic amplification | 0.0285 pg/mL    | This work  |

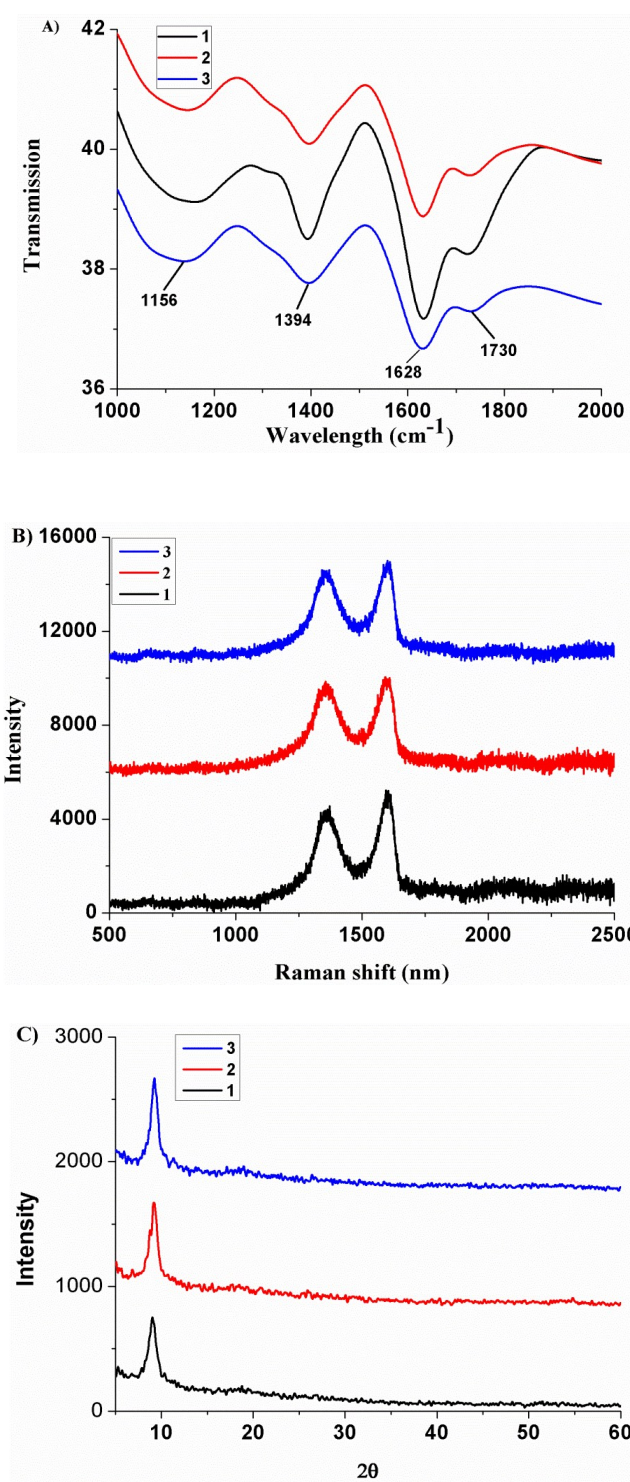

Fig. S1. The FT-IR spectrum (A), Raman spectrum (B), and XRD (C) of the different batches of GO (1, 2, and 3).

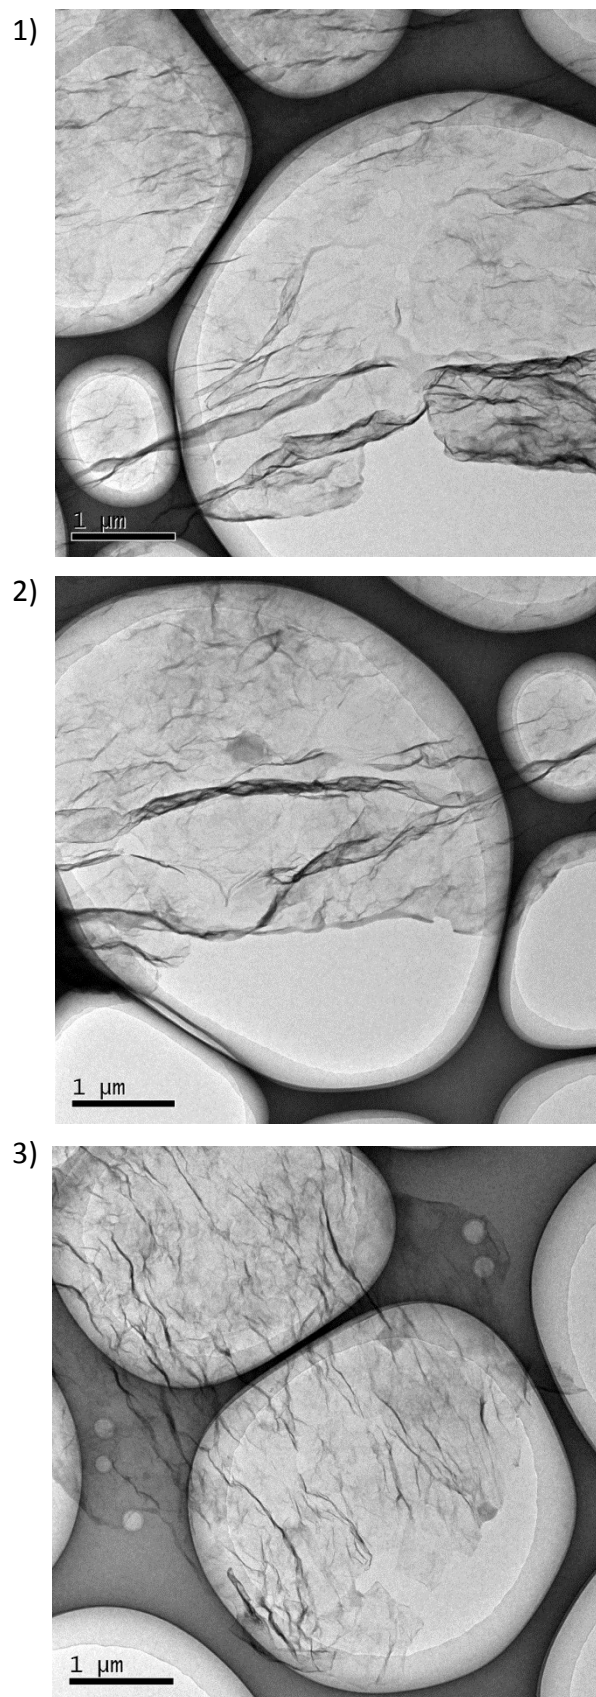

Fig. S2. TEM image of the different batches of GO (1, 2, and 3).

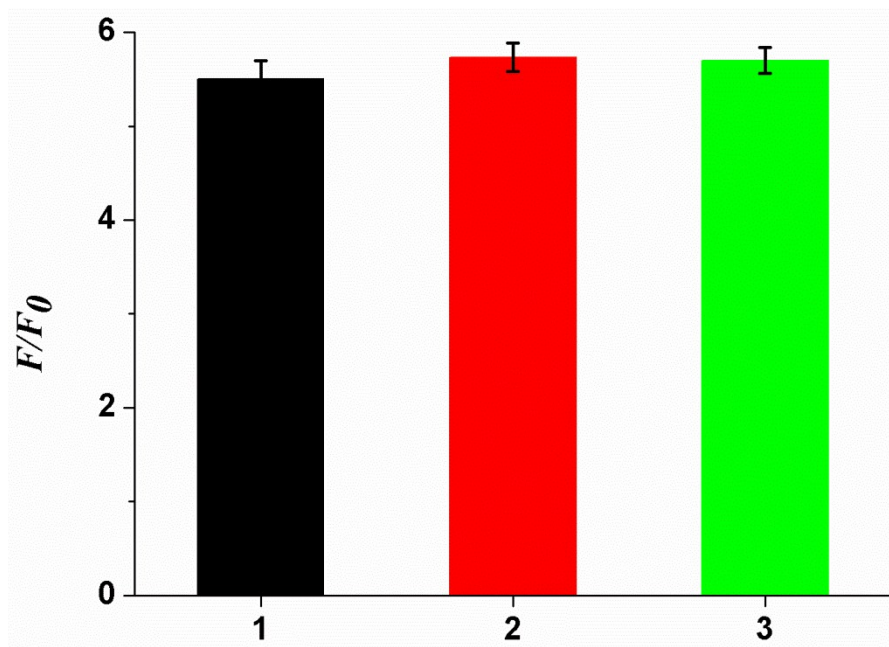

Fig. S3 The effects of the different batches (1, 2, and 3) of GO on the detect signal ( $F/F_0$ ). Where  $F$  or  $F_0$  were the fluorescence intensity in the presence and absence of CEA, respectively.

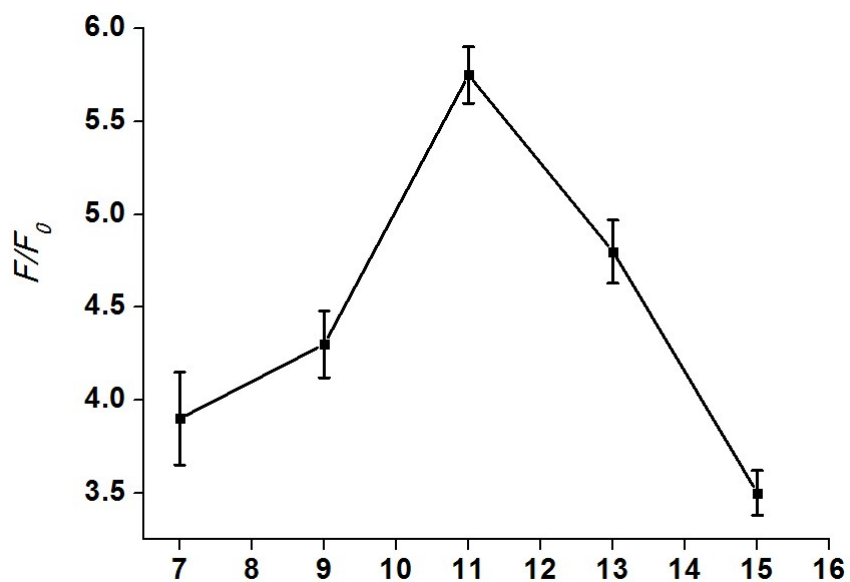

Fig. S4. The effect of hybridizing ability of the section III with the section I in the hairpin H1 probe on  $F/F_0$ . Experimental conditions: CEA, 500  $\mu\text{g}/\text{mL}$ ; hairpin, 80 nM; GO, 100,  $\mu\text{g}/\text{mL}$ ; klenow fragment, 25 U/mL; T7 Exo, 20 U/mL. Where  $F$  or  $F_0$  were the fluorescence intensity in the presence and absence of CEA, respectively.

## References

- [1] K. Ren, J. Wu, H. Ju and F. Yan, *Anal. Chem.*, 2015, **87**, 1694-1700.
- [2] C. Zong, J. Wu, M. Liu, F. Yan and H. Ju, *Chem. Sci.*, 2015, **6**, 2602-2607.
- [3] Z. Y. Lin, G. Y. Zhang, W. Q. Yang, B. Qiu, G. N. Chen, *Chem. Commun.*, 2012, **48**, 9918-9920.
- [4] M.-Q. He, K. Wang, W.-J. Wang, Y.-L. Yu and J.-H. Wang, *Anal. Chem.*, 2017, **89**, 9292- 9298.
- [5] H. Miao, L. Wang, Y. Zhuo, Z.N. Zhou and X.M. Yang, *Biosens. Bioelectron.*, 2016, **86**, 83-89.
